# Supplementary material for: Analysis of VEGF-A Regulated Gene Expression in Endothelial Cells to Identify Genes Linked to Angiogenesis
Source: PLoS One. 2011 Sep 13;6(9):e24887. doi: 10.1371/journal.pone.0024887 (PMC3172305; doi:10.1371/journal.pone.0024887)
Supplement: Table S1 — Molecular interactions and types included in Figure 3 . The file listed the interactions included in Figure 3. Proteins trafficking between components and transmembrane proteins may be represented in multiple compartments. (XLS) [file pone.0024887.s001.xls]

## Sheet: Supplemental1_Angiome_Interacti
Table S1: Angiome Interactions
protein1	protein2	type
ANXA2_Cytoplasmic	CEACAM1_Cytoplasmic	protein-protein
ANXA2_Cytoplasmic	MYOC_Cytoplasmic	protein-protein
ACE2_Cytoplasmic	GHRL_Cytoplasmic	protein-protein
GRIN1_Cytoplasmic	LRP8_Cytoplasmic	protein-protein
GRIN1_Cytoplasmic	MYH9_Cytoplasmic	protein-protein
GRIN1_Cytoplasmic	NF1_Cytoplasmic	protein-protein
CALB2_Cytoplasmic	KRT1_Cytoplasmic	protein-protein
ITGA5_Cytoplasmic	NISCH_Cytoplasmic	protein-protein
ITGA5_Cytoplasmic	ITGB3_Cytoplasmic	protein-protein
ITGA5_Cytoplasmic	TGM2_Cytoplasmic	protein-protein
FABP5_Cytoplasmic	S100A7_Cytoplasmic	protein-protein
PTPRK_Cytoplasmic	PTPRM_Cytoplasmic	protein-protein
SLC12A1_Cytoplasmic	STK39_Cytoplasmic	protein-protein
CEACAM1_Cytoplasmic	CEACAM8_Cytoplasmic	protein-protein
CEACAM1_Cytoplasmic	CEACAM6_Cytoplasmic	protein-protein
CEACAM1_Cytoplasmic	EGFR_Cytoplasmic	protein-protein
FASLG_Cytoplasmic	PACSIN2_Cytoplasmic	protein-protein
FASLG_Cytoplasmic	FN1_Cytoplasmic	protein-protein
FASLG_Cytoplasmic	JUN_Cytoplasmic	DNA-protein
FASLG_Cytoplasmic	SUMO1_Cytoplasmic	protein-protein
ENG_Cytoplasmic	TGFB3_Cytoplasmic	protein-protein
ENG_Cytoplasmic	TGFBR2_Cytoplasmic	protein-protein
ENG_Cytoplasmic	TGFB1_Cytoplasmic	protein-protein
ENG_Cytoplasmic	TGFB2_Cytoplasmic	protein-protein
SERPINE1_Cytoplasmic	JUN_Cytoplasmic	DNA-protein
SERPINE1_Cytoplasmic	THBD_Cytoplasmic	protein-protein
F3_Cytoplasmic	TFPI_Cytoplasmic	protein-protein
F3_Cytoplasmic	TGFB1_Cytoplasmic	protein-protein
F3_Cytoplasmic	F7_Cytoplasmic	protein-protein
EPAS1_Cytoplasmic	VEGFA_Cytoplasmic	protein-protein
EPAS1_Cytoplasmic	TGFB2_Cytoplasmic	protein-protein
EPAS1_Cytoplasmic	TGFB3_Cytoplasmic	protein-protein
EPAS1_Cytoplasmic	TGFB1_Cytoplasmic	protein-protein
EPAS1_Cytoplasmic	VEGFB_Cytoplasmic	protein-protein
CYBA_Cytoplasmic	NOX1_Cytoplasmic	protein-protein
CYBA_Cytoplasmic	NOXA1_Cytoplasmic	protein-protein
TGFB2_Cytoplasmic	TGFB3_Cytoplasmic	protein-protein
TGFB2_Cytoplasmic	TGFBR2_Cytoplasmic	protein-protein
MYBPC3_Cytoplasmic	MYH9_Cytoplasmic	protein-protein
KDR_Cytoplasmic	VEGFA_Cytoplasmic	protein-protein
KDR_Cytoplasmic	P2RY2_Cytoplasmic	protein-protein
KDR_Cytoplasmic	VEGFB_Cytoplasmic	protein-protein
KDR_Cytoplasmic	NRP1_Cytoplasmic	protein-protein
CCL5_Cytoplasmic	JUN_Cytoplasmic	protein-protein
CCL5_Cytoplasmic	NFKB1_Cytoplasmic	protein-protein
CCL5_Cytoplasmic	PF4_Cytoplasmic	protein-protein
CCL5_Cytoplasmic	CCR3_Cytoplasmic	protein-protein
CCL5_Cytoplasmic	SDC1_Cytoplasmic	protein-protein
CD36_Cytoplasmic	THBS1_Cytoplasmic	protein-protein
CD36_Cytoplasmic	COL1A1_Cytoplasmic	protein-protein
CD36_Cytoplasmic	ITGB3_Cytoplasmic	protein-protein
CD36_Cytoplasmic	THBS4_Cytoplasmic	protein-protein
CD36_Cytoplasmic	FN1_Cytoplasmic	protein-protein
FGF2_Cytoplasmic	MET_Cytoplasmic	protein-protein
FGF2_Cytoplasmic	JUN_Cytoplasmic	DNA-protein
FGF2_Cytoplasmic	PF4_Cytoplasmic	protein-protein
FGF2_Cytoplasmic	PDGFRB_Cytoplasmic	protein-protein
FGF2_Cytoplasmic	NRP1_Cytoplasmic	protein-protein
FGF2_Cytoplasmic	SDC2_Cytoplasmic	protein-protein
FGF2_Cytoplasmic	FGFRL1_Cytoplasmic	protein-protein
FGF2_Cytoplasmic	SDC1_Cytoplasmic	protein-protein
NOX1_Cytoplasmic	NOXA1_Cytoplasmic	protein-protein
ROBO2_Cytoplasmic	SLIT2_Cytoplasmic	protein-protein
PDGFRB_Cytoplasmic	VEGFA_Cytoplasmic	protein-protein
PDGFRB_Cytoplasmic	VEGFB_Cytoplasmic	protein-protein
HMOX1_Cytoplasmic	POR_Cytoplasmic	protein-protein
HMOX1_Cytoplasmic	JUN_Cytoplasmic	DNA-protein
MYH9_Cytoplasmic	OVGP1_Cytoplasmic	protein-protein
MYH9_Cytoplasmic	NFKB1_Cytoplasmic	protein-protein
MYH9_Cytoplasmic	NCL_Cytoplasmic	protein-protein
EP300_Cytoplasmic	EPAS1_Cytoplasmic	protein-protein
EP300_Cytoplasmic	PML_Cytoplasmic	protein-protein
EP300_Cytoplasmic	JUN_Cytoplasmic	protein-protein
EP300_Cytoplasmic	HIF1A_Cytoplasmic	protein-protein
EP300_Cytoplasmic	TP63_Cytoplasmic	protein-protein
OTOF_Cytoplasmic	STK39_Cytoplasmic	protein-protein
ATP5B_Cytoplasmic	ATPAF2_Cytoplasmic	protein-protein
SLC12A6_Cytoplasmic	STK39_Cytoplasmic	protein-protein
FLT1_Cytoplasmic	VEGFA_Cytoplasmic	protein-protein
FLT1_Cytoplasmic	VEGFB_Cytoplasmic	protein-protein
FLT1_Cytoplasmic	KDR_Cytoplasmic	protein-protein
FLT1_Cytoplasmic	NRP1_Cytoplasmic	protein-protein
TGFBR2_Cytoplasmic	JUN_Cytoplasmic	DNA-protein
TGFBR2_Cytoplasmic	TGFBRAP1_Cytoplasmic	protein-protein
VEGFA_Cytoplasmic	VEGFB_Cytoplasmic	protein-protein
VEGFA_Cytoplasmic	HIF1A_Cytoplasmic	DNA-protein
TGFB1_Cytoplasmic	THBS1_Cytoplasmic	protein-protein
TGFB1_Cytoplasmic	TGFBR2_Cytoplasmic	protein-protein
TGFB1_Cytoplasmic	JUN_Cytoplasmic	DNA-protein
TGFB1_Cytoplasmic	TGFB2_Cytoplasmic	protein-protein
F7_Cytoplasmic	JUN_Cytoplasmic	DNA-protein
F7_Cytoplasmic	TFPI_Cytoplasmic	protein-protein
PML_Cytoplasmic	TGFBR2_Cytoplasmic	protein-protein
PML_Cytoplasmic	SUMO1_Cytoplasmic	protein-protein
PML_Cytoplasmic	SRF_Cytoplasmic	protein-protein
PML_Cytoplasmic	SUMO3_Cytoplasmic	protein-protein
EGF_Cytoplasmic	KDR_Cytoplasmic	protein-protein
EGF_Cytoplasmic	EGFR_Cytoplasmic	protein-protein
EGF_Cytoplasmic	PDGFRB_Cytoplasmic	protein-protein
EGF_Cytoplasmic	MET_Cytoplasmic	protein-protein
EGF_Cytoplasmic	ERBB2_Cytoplasmic	protein-protein
EGF_Cytoplasmic	FLT1_Cytoplasmic	protein-protein
ADAM23_Cytoplasmic	ITGB3_Cytoplasmic	protein-protein
ADAM23_Cytoplasmic	ITGAV_Cytoplasmic	protein-protein
GHRL_Cytoplasmic	GHSR_Cytoplasmic	protein-protein
GHRL_Cytoplasmic	MLNR_Cytoplasmic	protein-protein
MYOC_Cytoplasmic	SERPINF1_Cytoplasmic	protein-protein
F10_Cytoplasmic	F7_Cytoplasmic	protein-protein
F10_Cytoplasmic	F3_Cytoplasmic	protein-protein
F10_Cytoplasmic	F2_Cytoplasmic	protein-protein
F10_Cytoplasmic	THBD_Cytoplasmic	protein-protein
F10_Cytoplasmic	TFPI_Cytoplasmic	protein-protein
CEACAM6_Cytoplasmic	CEACAM8_Cytoplasmic	protein-protein
MET_Cytoplasmic	VEGFA_Cytoplasmic	protein-protein
MET_Cytoplasmic	VEGFB_Cytoplasmic	protein-protein
CREBBP_Cytoplasmic	EPAS1_Cytoplasmic	protein-protein
CREBBP_Cytoplasmic	EP300_Cytoplasmic	protein-protein
CREBBP_Cytoplasmic	PML_Cytoplasmic	protein-protein
CREBBP_Cytoplasmic	JUN_Cytoplasmic	protein-protein
CREBBP_Cytoplasmic	HIF1A_Cytoplasmic	protein-protein
CREBBP_Cytoplasmic	FOXO4_Cytoplasmic	protein-protein
CREBBP_Cytoplasmic	SRF_Cytoplasmic	protein-protein
CREBBP_Cytoplasmic	CTNNB1_Cytoplasmic	protein-protein
STAB2_Cytoplasmic	SUMO1_Cytoplasmic	protein-protein
STAB2_Cytoplasmic	SUMO3_Cytoplasmic	protein-protein
JUN_Cytoplasmic	FASLG_Cytoplasmic	protein-DNA
JUN_Cytoplasmic	SERPINE1_Cytoplasmic	protein-DNA
JUN_Cytoplasmic	SUMO1_Cytoplasmic	protein-protein
JUN_Cytoplasmic	HMOX1_Cytoplasmic	protein-DNA
JUN_Cytoplasmic	EP300_Cytoplasmic	protein-DNA
JUN_Cytoplasmic	TGFBR2_Cytoplasmic	protein-DNA
JUN_Cytoplasmic	PML_Cytoplasmic	protein-protein
JUN_Cytoplasmic	SUMO3_Cytoplasmic	protein-protein
JUN_Cytoplasmic	SOX10_Cytoplasmic	protein-protein
JUN_Cytoplasmic	ATP6AP1_Cytoplasmic	protein-DNA
JUN_Cytoplasmic	FGF2_Cytoplasmic	protein-DNA
JUN_Cytoplasmic	TGFB1_Cytoplasmic	protein-DNA
JUN_Cytoplasmic	F7_Cytoplasmic	protein-DNA
JUN_Cytoplasmic	JAG1_Cytoplasmic	protein-DNA
JUN_Cytoplasmic	HIF1A_Cytoplasmic	protein-DNA
SCARB2_Cytoplasmic	THBS1_Cytoplasmic	protein-protein
REG3A_Cytoplasmic	SDC2_Cytoplasmic	protein-protein
CHID1_Cytoplasmic	STAB1_Cytoplasmic	protein-protein
PTPRM_Cytoplasmic	PTPRS_Cytoplasmic	protein-protein
NRP1_Cytoplasmic	VEGFA_Cytoplasmic	protein-protein
NRP1_Cytoplasmic	VEGFB_Cytoplasmic	protein-protein
SDC2_Cytoplasmic	THBS1_Cytoplasmic	protein-protein
SDC2_Cytoplasmic	TGFB1_Cytoplasmic	protein-protein
SDC2_Cytoplasmic	THBS4_Cytoplasmic	protein-protein
HHEX_Cytoplasmic	PML_Cytoplasmic	protein-protein
HHEX_Cytoplasmic	JUN_Cytoplasmic	protein-protein
HHEX_Cytoplasmic	SOX10_Cytoplasmic	protein-protein
SERPINF1_Cytoplasmic	TP63_Cytoplasmic	DNA-protein
ITGAV_Cytoplasmic	THBS1_Cytoplasmic	protein-protein
ITGAV_Cytoplasmic	THY1_Cytoplasmic	protein-protein
ITGAV_Cytoplasmic	TGFB3_Cytoplasmic	protein-protein
ITGAV_Cytoplasmic	TGFB1_Cytoplasmic	protein-protein
ITGAV_Cytoplasmic	P2RY2_Cytoplasmic	protein-protein
ITGAV_Cytoplasmic	ITGB3_Cytoplasmic	protein-protein
SOX10_Cytoplasmic	SUMO3_Cytoplasmic	protein-protein
SOX10_Cytoplasmic	SUMO1_Cytoplasmic	protein-protein
TGFB3_Cytoplasmic	TGFBR2_Cytoplasmic	protein-protein
CASK_Cytoplasmic	SDC2_Cytoplasmic	protein-protein
CASK_Cytoplasmic	NF1_Cytoplasmic	protein-protein
CASK_Cytoplasmic	SDC1_Cytoplasmic	protein-protein
ERAP1_Cytoplasmic	IL6R_Cytoplasmic	protein-protein
ERAP1_Cytoplasmic	ERAP2_Cytoplasmic	protein-protein
ACVRL1_Cytoplasmic	TGFBR2_Cytoplasmic	protein-protein
ACVRL1_Cytoplasmic	TGFB3_Cytoplasmic	protein-protein
ACVRL1_Cytoplasmic	ENG_Cytoplasmic	protein-protein
ACVRL1_Cytoplasmic	TGFB1_Cytoplasmic	protein-protein
ACVRL1_Cytoplasmic	TGFBRAP1_Cytoplasmic	protein-protein
IL6R_Cytoplasmic	MAGI1_Cytoplasmic	protein-protein
ATP6AP1_Cytoplasmic	JUN_Cytoplasmic	DNA-protein
TNFRSF12A_Cytoplasmic	TNFSF12_Cytoplasmic	protein-protein
AGPAT5_Cytoplasmic	PF4_Cytoplasmic	protein-protein
JAG1_Cytoplasmic	THBS1_Cytoplasmic	protein-protein
JAG1_Cytoplasmic	JUN_Cytoplasmic	DNA-protein
JAG1_Cytoplasmic	POFUT1_Cytoplasmic	protein-protein
ANXA3_Cytoplasmic	REG3A_Cytoplasmic	protein-protein
ANXA3_Cytoplasmic	EMG1_Cytoplasmic	protein-protein
GHRHR_Cytoplasmic	GHRL_Cytoplasmic	protein-protein
GHRHR_Cytoplasmic	MLNR_Cytoplasmic	protein-protein
SPHK1_Cytoplasmic	SPHKAP_Cytoplasmic	protein-protein
ATPIF1_Cytoplasmic	DYNC1LI2_Cytoplasmic	protein-protein
ROBO1_Cytoplasmic	SLIT2_Cytoplasmic	protein-protein
ROBO1_Cytoplasmic	ROBO2_Cytoplasmic	protein-protein
HIF1A_Cytoplasmic	VEGFA_Cytoplasmic	protein-DNA
HIF1A_Cytoplasmic	TGFB3_Cytoplasmic	protein-protein
HIF1A_Cytoplasmic	TGFB1_Cytoplasmic	protein-protein
HIF1A_Cytoplasmic	VEGFB_Cytoplasmic	protein-protein
HIF1A_Cytoplasmic	JUN_Cytoplasmic	DNA-protein
HIF1A_Cytoplasmic	TGFB2_Cytoplasmic	protein-protein
F2_Cytoplasmic	F7_Cytoplasmic	protein-protein
F2_Cytoplasmic	ITGA5_Cytoplasmic	protein-protein
F2_Cytoplasmic	ITGB3_Cytoplasmic	protein-protein
F2_Cytoplasmic	F3_Cytoplasmic	protein-protein
F2_Cytoplasmic	SERPINE1_Cytoplasmic	protein-protein
F2_Cytoplasmic	THBS1_Cytoplasmic	protein-protein
F2_Cytoplasmic	PROC_Cytoplasmic	protein-protein
F2_Cytoplasmic	THBD_Cytoplasmic	protein-protein
COL1A1_Cytoplasmic	ITGA5_Cytoplasmic	protein-protein
COL1A1_Cytoplasmic	FN1_Cytoplasmic	protein-protein
COL1A1_Cytoplasmic	THBS1_Cytoplasmic	protein-protein
COL1A1_Cytoplasmic	TMPRSS6_Cytoplasmic	protein-protein
COL1A1_Cytoplasmic	SDC2_Cytoplasmic	protein-protein
COL1A1_Cytoplasmic	SDC1_Cytoplasmic	protein-protein
TPH1_Cytoplasmic	WARS_Cytoplasmic	protein-protein
EPHB4_Cytoplasmic	GRIN1_Cytoplasmic	protein-protein
PCSK5_Cytoplasmic	PTPRM_Cytoplasmic	protein-protein
AGGF1_Cytoplasmic	PLDN_Cytoplasmic	protein-protein
AGGF1_Cytoplasmic	TNFSF12_Cytoplasmic	protein-protein
ADCY6_Cytoplasmic	CHRNA7_Cytoplasmic	protein-protein
IL6_Cytoplasmic	NFKB1_Cytoplasmic	protein-protein
IL6_Cytoplasmic	JUN_Cytoplasmic	protein-protein
IL6_Cytoplasmic	IL6R_Cytoplasmic	protein-protein
IL6_Cytoplasmic	PTHLH_Cytoplasmic	protein-protein
IL6_Cytoplasmic	OSM_Cytoplasmic	protein-protein
CTGF_Cytoplasmic	VEGFA_Cytoplasmic	protein-protein
CTGF_Cytoplasmic	TGFB2_Cytoplasmic	protein-protein
CTGF_Cytoplasmic	TGFB3_Cytoplasmic	protein-protein
CTGF_Cytoplasmic	TGFB1_Cytoplasmic	protein-protein
CTGF_Cytoplasmic	FN1_Cytoplasmic	protein-protein
CTGF_Cytoplasmic	ITGA5_Cytoplasmic	protein-protein
NF1_Cytoplasmic	SDC2_Cytoplasmic	protein-protein
PPFIBP1_Cytoplasmic	PTPRM_Cytoplasmic	protein-protein
GPC1_Cytoplasmic	SLIT2_Cytoplasmic	protein-protein
GPC1_Cytoplasmic	VEGFA_Cytoplasmic	protein-protein
CDH16_Cytoplasmic	CTNNB1_Cytoplasmic	protein-protein
TNFRSF25_Cytoplasmic	TNFSF12_Cytoplasmic	protein-protein
TP63_Cytoplasmic	SERPINF1_Cytoplasmic	protein-DNA
BLVRB_Cytoplasmic	HMOX1_Cytoplasmic	protein-protein
CPM_Cytoplasmic	EGF_Cytoplasmic	protein-protein
APP_Cytoplasmic	TGFB2_Cytoplasmic	protein-protein
APP_Cytoplasmic	NF1_Cytoplasmic	protein-protein
APP_Cytoplasmic	GPC1_Cytoplasmic	protein-protein
APP_Cytoplasmic	TGFB1_Cytoplasmic	protein-protein
APP_Cytoplasmic	CHRNA7_Cytoplasmic	protein-protein
PTPRA_Cytoplasmic	PTPRS_Cytoplasmic	protein-protein
PTPRA_Cytoplasmic	PTPRM_Cytoplasmic	protein-protein
CTNNB1_Cytoplasmic	GRIN1_Cytoplasmic	protein-protein
CTNNB1_Cytoplasmic	PTPRK_Cytoplasmic	protein-protein
CTNNB1_Cytoplasmic	KDR_Cytoplasmic	protein-protein
CTNNB1_Cytoplasmic	EP300_Cytoplasmic	protein-protein
CTNNB1_Cytoplasmic	FLT1_Cytoplasmic	protein-protein
CTNNB1_Cytoplasmic	TGFBR2_Cytoplasmic	protein-protein
CTNNB1_Cytoplasmic	MET_Cytoplasmic	protein-protein
CTNNB1_Cytoplasmic	FSCN2_Cytoplasmic	protein-protein
CTNNB1_Cytoplasmic	PTPRM_Cytoplasmic	protein-protein
CTNNB1_Cytoplasmic	MAGI1_Cytoplasmic	protein-protein
CTNNB1_Cytoplasmic	FOXO4_Cytoplasmic	protein-protein
CTNNB1_Cytoplasmic	EGFR_Cytoplasmic	protein-protein
CTNNB1_Cytoplasmic	NFKB1_Cytoplasmic	protein-protein
CTNNB1_Cytoplasmic	ERBB2_Cytoplasmic	protein-protein
MIF_Cytoplasmic	S100A7_Cytoplasmic	protein-protein
EGFR_Cytoplasmic	ITGA5_Cytoplasmic	protein-protein
EGFR_Cytoplasmic	FGF2_Cytoplasmic	protein-protein
EGFR_Cytoplasmic	PDGFRB_Cytoplasmic	protein-protein
EGFR_Cytoplasmic	VEGFA_Cytoplasmic	protein-protein
EGFR_Cytoplasmic	PTPRS_Cytoplasmic	protein-protein
EGFR_Cytoplasmic	MET_Cytoplasmic	protein-protein
EGFR_Cytoplasmic	VEGFB_Cytoplasmic	protein-protein
EGFR_Cytoplasmic	S100A7_Cytoplasmic	protein-protein
EGFR_Cytoplasmic	ERBB2_Cytoplasmic	protein-protein
EFNB3_Cytoplasmic	EPHB4_Cytoplasmic	protein-protein
HDAC9_Cytoplasmic	SUMO1_Cytoplasmic	protein-protein
NFKB1_Cytoplasmic	VEGFA_Cytoplasmic	protein-protein
NFKB1_Cytoplasmic	VEGFB_Cytoplasmic	protein-protein
ARD1B_Cytoplasmic	HIF1A_Cytoplasmic	protein-protein
BTG1_Cytoplasmic	JUN_Cytoplasmic	protein-protein
ITGB3_Cytoplasmic	THY1_Cytoplasmic	protein-protein
ITGB3_Cytoplasmic	P2RY2_Cytoplasmic	protein-protein
ITGB3_Cytoplasmic	TGM2_Cytoplasmic	protein-protein
ITGB3_Cytoplasmic	THBS1_Cytoplasmic	protein-protein
ITGB3_Cytoplasmic	KDR_Cytoplasmic	protein-protein
ITGB3_Cytoplasmic	PDGFRB_Cytoplasmic	protein-protein
CDH24_Cytoplasmic	CTNNB1_Cytoplasmic	protein-protein
FN1_Cytoplasmic	TGM2_Cytoplasmic	protein-protein
FN1_Cytoplasmic	ITGA5_Cytoplasmic	protein-protein
FN1_Cytoplasmic	TMPRSS6_Cytoplasmic	protein-protein
FN1_Cytoplasmic	ITGB3_Cytoplasmic	protein-protein
FN1_Cytoplasmic	MYOC_Cytoplasmic	protein-protein
FN1_Cytoplasmic	THBS1_Cytoplasmic	protein-protein
FN1_Cytoplasmic	REG3A_Cytoplasmic	protein-protein
FN1_Cytoplasmic	SDC2_Cytoplasmic	protein-protein
FN1_Cytoplasmic	SDC1_Cytoplasmic	protein-protein
S100A7_Cytoplasmic	UCHL1_Cytoplasmic	protein-protein
S100A7_Cytoplasmic	TGM2_Cytoplasmic	protein-protein
ROR2_Cytoplasmic	WNT5A_Cytoplasmic	protein-protein
CYFIP1_Cytoplasmic	NCL_Cytoplasmic	protein-protein
PROC_Cytoplasmic	SERPINE1_Cytoplasmic	protein-protein
PROC_Cytoplasmic	THBD_Cytoplasmic	protein-protein
PF4_Cytoplasmic	THBD_Cytoplasmic	protein-protein
PF4_Cytoplasmic	SDC2_Cytoplasmic	protein-protein
PF4_Cytoplasmic	PROC_Cytoplasmic	protein-protein
TFPI_Cytoplasmic	THBS1_Cytoplasmic	protein-protein
BMP2_Cytoplasmic	TGFB2_Cytoplasmic	protein-protein
BMP2_Cytoplasmic	TGFB1_Cytoplasmic	protein-protein
BMP2_Cytoplasmic	ENG_Cytoplasmic	protein-protein
ERBB2_Cytoplasmic	ITGA5_Cytoplasmic	protein-protein
ERBB2_Cytoplasmic	VEGFA_Cytoplasmic	protein-protein
ERBB2_Cytoplasmic	VEGFB_Cytoplasmic	protein-protein
ADIPOQ_Cytoplasmic	CDH13_Cytoplasmic	protein-protein
SDC1_Cytoplasmic	THBS1_Cytoplasmic	protein-protein
SDC1_Cytoplasmic	THBS4_Cytoplasmic	protein-protein
CDH17_Cytoplasmic	CTNNB1_Cytoplasmic	protein-protein
HOXA7_Nuclear	MEIS1_Nuclear	protein-protein
CDX4_Nuclear	HOXA5_Nuclear	protein-protein
CASK_Nuclear	ID1_Nuclear	protein-protein
CASK_Nuclear	NF1_Nuclear	protein-protein
GATA2_Nuclear	PML_Nuclear	protein-protein
GATA2_Nuclear	HDAC5_Nuclear	protein-protein
GATA2_Nuclear	JUN_Nuclear	protein-protein
GATA2_Nuclear	HHEX_Nuclear	protein-protein
GATA2_Nuclear	HIF1A_Nuclear	protein-protein
FOS_Nuclear	SUMO1_Nuclear	protein-protein
FOS_Nuclear	SRF_Nuclear	DNA-protein
FOS_Nuclear	NFKB1_Nuclear	protein-protein
FOS_Nuclear	PML_Nuclear	protein-protein
FOS_Nuclear	JUN_Nuclear	DNA-protein
HOXB13_Nuclear	MEIS1_Nuclear	protein-protein
EGR3_Nuclear	FASLG_Nuclear	protein-DNA
FASLG_Nuclear	EGR3_Nuclear	DNA-protein
FASLG_Nuclear	JUN_Nuclear	DNA-protein
FASLG_Nuclear	SUMO1_Nuclear	protein-protein
EPAS1_Nuclear	TGFB3_Nuclear	protein-protein
EPAS1_Nuclear	TGFB1_Nuclear	protein-protein
HIF1A_Nuclear	TGFB3_Nuclear	protein-protein
HIF1A_Nuclear	TGFB1_Nuclear	protein-protein
HIF1A_Nuclear	SSX4_Nuclear	protein-protein
HIF1A_Nuclear	VHLL_Nuclear	protein-protein
HIF1A_Nuclear	JUN_Nuclear	DNA-protein
HTATIP2_Nuclear	NCOA5_Nuclear	protein-protein
FGF2_Nuclear	JUN_Nuclear	DNA-protein
SRF_Nuclear	FOS_Nuclear	protein-DNA
NKX2-3_Nuclear	SRF_Nuclear	protein-protein
AGGF1_Nuclear	TNFSF12_Nuclear	protein-protein
ID1_Nuclear	MYF6_Nuclear	protein-protein
ID1_Nuclear	MYF5_Nuclear	protein-protein
ID1_Nuclear	IFI16_Nuclear	protein-protein
ID1_Nuclear	MYOD1_Nuclear	protein-protein
ID1_Nuclear	MYOG_Nuclear	protein-protein
ID1_Nuclear	TCF4_Nuclear	protein-protein
HMOX1_Nuclear	JUN_Nuclear	DNA-protein
MYH9_Nuclear	NFKB1_Nuclear	protein-protein
MYH9_Nuclear	NCL_Nuclear	protein-protein
ANG_Nuclear	TDGF1_Nuclear	protein-protein
EP300_Nuclear	EPAS1_Nuclear	protein-protein
EP300_Nuclear	PML_Nuclear	protein-protein
EP300_Nuclear	JUN_Nuclear	protein-protein
EP300_Nuclear	HOXB3_Nuclear	protein-protein
EP300_Nuclear	TWIST1_Nuclear	protein-protein
EP300_Nuclear	HIF1A_Nuclear	protein-protein
EP300_Nuclear	TP73_Nuclear	protein-protein
EP300_Nuclear	TCF4_Nuclear	protein-protein
EP300_Nuclear	TP63_Nuclear	protein-protein
EP300_Nuclear	MEF2C_Nuclear	protein-protein
EP300_Nuclear	MYOD1_Nuclear	protein-protein
ATP5B_Nuclear	ATPAF2_Nuclear	protein-protein
TP63_Nuclear	TP73_Nuclear	protein-protein
APP_Nuclear	NF1_Nuclear	protein-protein
APP_Nuclear	TGFB1_Nuclear	protein-protein
CTNNB1_Nuclear	EP300_Nuclear	protein-protein
CTNNB1_Nuclear	LEO1_Nuclear	protein-protein
CTNNB1_Nuclear	PTPRM_Nuclear	protein-protein
CTNNB1_Nuclear	FOXO4_Nuclear	protein-protein
CTNNB1_Nuclear	TCF4_Nuclear	protein-protein
CTNNB1_Nuclear	EGFR_Nuclear	protein-protein
CTNNB1_Nuclear	NFKB1_Nuclear	protein-protein
CTNNB1_Nuclear	ERBB2_Nuclear	protein-protein
HOXA5_Nuclear	TWIST1_Nuclear	protein-protein
HOXA5_Nuclear	MEIS1_Nuclear	protein-protein
TGFB1_Nuclear	JUN_Nuclear	DNA-protein
MEIS1_Nuclear	JUN_Nuclear	DNA-protein
EGFR_Nuclear	FGF2_Nuclear	protein-protein
EGFR_Nuclear	S100A7_Nuclear	protein-protein
EGFR_Nuclear	ERBB2_Nuclear	protein-protein
HDAC9_Nuclear	SUMO1_Nuclear	protein-protein
PML_Nuclear	TP73_Nuclear	protein-protein
PML_Nuclear	SUMO1_Nuclear	protein-protein
PML_Nuclear	SRF_Nuclear	protein-protein
HOXA3_Nuclear	SOX10_Nuclear	protein-protein
ARD1B_Nuclear	HIF1A_Nuclear	protein-protein
BTG1_Nuclear	JUN_Nuclear	protein-protein
BTG1_Nuclear	MYOD1_Nuclear	protein-protein
BTG1_Nuclear	MYOG_Nuclear	protein-protein
S100A7_Nuclear	UCHL1_Nuclear	protein-protein
CREBBP_Nuclear	EPAS1_Nuclear	protein-protein
CREBBP_Nuclear	EP300_Nuclear	protein-protein
CREBBP_Nuclear	PML_Nuclear	protein-protein
CREBBP_Nuclear	JUN_Nuclear	protein-protein
CREBBP_Nuclear	HOXB3_Nuclear	protein-protein
CREBBP_Nuclear	HIF1A_Nuclear	protein-protein
CREBBP_Nuclear	TP73_Nuclear	protein-protein
CREBBP_Nuclear	FOXO4_Nuclear	protein-protein
CREBBP_Nuclear	SRF_Nuclear	protein-protein
CREBBP_Nuclear	CTNNB1_Nuclear	protein-protein
CREBBP_Nuclear	MYOD1_Nuclear	protein-protein
JUN_Nuclear	FASLG_Nuclear	protein-DNA
JUN_Nuclear	SUMO1_Nuclear	protein-protein
JUN_Nuclear	HMOX1_Nuclear	protein-DNA
JUN_Nuclear	EP300_Nuclear	protein-DNA
JUN_Nuclear	MEIS1_Nuclear	protein-DNA
JUN_Nuclear	PML_Nuclear	protein-protein
JUN_Nuclear	SOX10_Nuclear	protein-protein
JUN_Nuclear	FOS_Nuclear	protein-DNA
JUN_Nuclear	FGF2_Nuclear	protein-DNA
JUN_Nuclear	TGFB1_Nuclear	protein-DNA
JUN_Nuclear	HIF1A_Nuclear	protein-DNA
JUN_Nuclear	MYOD1_Nuclear	protein-protein
FOXG1_Nuclear	FOXO4_Nuclear	protein-protein
CYFIP1_Nuclear	NCL_Nuclear	protein-protein
MEF2C_Nuclear	SOX18_Nuclear	protein-protein
HOPX_Nuclear	SRF_Nuclear	protein-protein
HDAC5_Nuclear	MEF2C_Nuclear	protein-protein
HDAC5_Nuclear	HR_Nuclear	protein-protein
HHEX_Nuclear	PML_Nuclear	protein-protein
HHEX_Nuclear	JUN_Nuclear	protein-protein
HHEX_Nuclear	SOX10_Nuclear	protein-protein
MYOD1_Nuclear	SRF_Nuclear	protein-protein
MYOD1_Nuclear	TWIST1_Nuclear	protein-protein
MYOD1_Nuclear	TCF4_Nuclear	protein-protein
SOX10_Nuclear	SUMO1_Nuclear	protein-protein
MYOG_Nuclear	SRF_Nuclear	protein-protein
ORM1_Extracellular	SERPINE1_Extracellular	protein-protein
BMP4_Extracellular	CHRDL1_Extracellular	protein-protein
BMP4_Extracellular	GREM2_Extracellular	protein-protein
BMP4_Extracellular	BMP8B_Extracellular	protein-protein
BMP4_Extracellular	BMPER_Extracellular	protein-protein
ANXA2_Extracellular	PLG_Extracellular	protein-protein
ANXA2_Extracellular	CEACAM1_Extracellular	protein-protein
ANXA2_Extracellular	MYOC_Extracellular	protein-protein
ANXA2_Extracellular	APOH_Extracellular	protein-protein
ACE2_Extracellular	GHRL_Extracellular	protein-protein
TGFB3_Extracellular	VASN_Extracellular	protein-protein
BMP3_Extracellular	COL4A2_Extracellular	protein-protein
BMP3_Extracellular	TGFB1_Extracellular	protein-protein
ERAP1_Extracellular	IL6R_Extracellular	protein-protein
PZP_Extracellular	TGFB1_Extracellular	protein-protein
PZP_Extracellular	TGFB2_Extracellular	protein-protein
HSPG2_Extracellular	LAMA1_Extracellular	protein-protein
SFRP2_Extracellular	WNT5A_Extracellular	protein-protein
BMP6_Extracellular	BMPER_Extracellular	protein-protein
LAMA5_Extracellular	MYOC_Extracellular	protein-protein
PLG_Extracellular	THBS1_Extracellular	protein-protein
PLG_Extracellular	SERPINE1_Extracellular	protein-protein
CEACAM1_Extracellular	CEACAM8_Extracellular	protein-protein
CEACAM1_Extracellular	EGFR_Extracellular	protein-protein
DCN_Extracellular	THBS1_Extracellular	protein-protein
DCN_Extracellular	TGFB2_Extracellular	protein-protein
DCN_Extracellular	TGFB3_Extracellular	protein-protein
DCN_Extracellular	TGFB1_Extracellular	protein-protein
DCN_Extracellular	EGFR_Extracellular	protein-protein
DCN_Extracellular	FN1_Extracellular	protein-protein
FASLG_Extracellular	TNFRSF6B_Extracellular	protein-protein
FASLG_Extracellular	FN1_Extracellular	protein-protein
ENG_Extracellular	TGFB3_Extracellular	protein-protein
ENG_Extracellular	TGFB1_Extracellular	protein-protein
ENG_Extracellular	TGFB2_Extracellular	protein-protein
SERPINE1_Extracellular	VTN_Extracellular	protein-protein
SERPINE1_Extracellular	THBD_Extracellular	protein-protein
F3_Extracellular	PLG_Extracellular	protein-protein
F3_Extracellular	TFPI_Extracellular	protein-protein
F3_Extracellular	TGFB1_Extracellular	protein-protein
F3_Extracellular	F7_Extracellular	protein-protein
JAG1_Extracellular	THBS1_Extracellular	protein-protein
RNASE1_Extracellular	RNH1_Extracellular	protein-protein
KLK3_Extracellular	PTHLH_Extracellular	protein-protein
KLK3_Extracellular	PZP_Extracellular	protein-protein
KLK3_Extracellular	PLG_Extracellular	protein-protein
PGF_Extracellular	VEGFA_Extracellular	protein-protein
TGFB2_Extracellular	TGFB3_Extracellular	protein-protein
TGFB2_Extracellular	VTN_Extracellular	protein-protein
TGFB2_Extracellular	VASN_Extracellular	protein-protein
F2_Extracellular	F7_Extracellular	protein-protein
F2_Extracellular	SERPINE2_Extracellular	protein-protein
F2_Extracellular	F3_Extracellular	protein-protein
F2_Extracellular	SERPINE1_Extracellular	protein-protein
F2_Extracellular	VTN_Extracellular	protein-protein
F2_Extracellular	THBS1_Extracellular	protein-protein
F2_Extracellular	PROC_Extracellular	protein-protein
F2_Extracellular	THBD_Extracellular	protein-protein
COL4A2_Extracellular	FBLN2_Extracellular	protein-protein
COL4A2_Extracellular	SERPINE2_Extracellular	protein-protein
COL4A2_Extracellular	SAA1_Extracellular	protein-protein
COL4A2_Extracellular	DCN_Extracellular	protein-protein
COL4A2_Extracellular	OSM_Extracellular	protein-protein
COL4A2_Extracellular	FN1_Extracellular	protein-protein
CCL5_Extracellular	PF4_Extracellular	protein-protein
CCL5_Extracellular	IGFBP7_Extracellular	protein-protein
COL1A1_Extracellular	DCN_Extracellular	protein-protein
COL1A1_Extracellular	FN1_Extracellular	protein-protein
COL1A1_Extracellular	THBS1_Extracellular	protein-protein
FGF2_Extracellular	FGF5_Extracellular	protein-protein
FGF2_Extracellular	HSPG2_Extracellular	protein-protein
FGF2_Extracellular	VTN_Extracellular	protein-protein
FGF2_Extracellular	PF4_Extracellular	protein-protein
FGF2_Extracellular	NRP1_Extracellular	protein-protein
DEFA5_Extracellular	PRSS1_Extracellular	protein-protein
ANTXR2_Extracellular	COL4A3_Extracellular	protein-protein
ANTXR2_Extracellular	COL4A2_Extracellular	protein-protein
COL4A3_Extracellular	SERPINE2_Extracellular	protein-protein
COL4A3_Extracellular	SAA1_Extracellular	protein-protein
COL4A3_Extracellular	DCN_Extracellular	protein-protein
COL4A3_Extracellular	OSM_Extracellular	protein-protein
COL4A3_Extracellular	HSPG2_Extracellular	protein-protein
COL4A3_Extracellular	FBLN2_Extracellular	protein-protein
COL4A3_Extracellular	USH2A_Extracellular	protein-protein
COL4A3_Extracellular	FN1_Extracellular	protein-protein
AGGF1_Extracellular	TNFSF12_Extracellular	protein-protein
COL18A1_Extracellular	GPC1_Extracellular	protein-protein
COL18A1_Extracellular	FBLN2_Extracellular	protein-protein
ANG_Extracellular	TNFSF8_Extracellular	protein-protein
ANG_Extracellular	TDGF1_Extracellular	protein-protein
ANG_Extracellular	RNH1_Extracellular	protein-protein
TNXB_Extracellular	VEGFA_Extracellular	protein-protein
TNXB_Extracellular	VEGFB_Extracellular	protein-protein
IL6_Extracellular	IL6R_Extracellular	protein-protein
IL6_Extracellular	PTHLH_Extracellular	protein-protein
IL6_Extracellular	OSM_Extracellular	protein-protein
CTGF_Extracellular	VEGFA_Extracellular	protein-protein
CTGF_Extracellular	TGFB2_Extracellular	protein-protein
CTGF_Extracellular	TGFB3_Extracellular	protein-protein
CTGF_Extracellular	HSPG2_Extracellular	protein-protein
CTGF_Extracellular	TGFB1_Extracellular	protein-protein
CTGF_Extracellular	FN1_Extracellular	protein-protein
FLT1_Extracellular	VEGFA_Extracellular	protein-protein
FLT1_Extracellular	VEGFB_Extracellular	protein-protein
FLT1_Extracellular	PGF_Extracellular	protein-protein
FLT1_Extracellular	NRP1_Extracellular	protein-protein
FGF5_Extracellular	VEGFA_Extracellular	protein-protein
VEGFA_Extracellular	VTN_Extracellular	protein-protein
VEGFA_Extracellular	VEGFB_Extracellular	protein-protein
GPC1_Extracellular	SLIT2_Extracellular	protein-protein
GPC1_Extracellular	VEGFA_Extracellular	protein-protein
GPC1_Extracellular	SLIT1_Extracellular	protein-protein
TNFRSF25_Extracellular	TNFSF12_Extracellular	protein-protein
LAMA1_Extracellular	SAA1_Extracellular	protein-protein
LAMA1_Extracellular	PLG_Extracellular	protein-protein
ANGPT1_Extracellular	ANGPT2_Extracellular	protein-protein
APP_Extracellular	HSPG2_Extracellular	protein-protein
APP_Extracellular	TGFB2_Extracellular	protein-protein
APP_Extracellular	COL4A2_Extracellular	protein-protein
APP_Extracellular	COL4A3_Extracellular	protein-protein
APP_Extracellular	GPC1_Extracellular	protein-protein
APP_Extracellular	LAMA1_Extracellular	protein-protein
APP_Extracellular	TGFB1_Extracellular	protein-protein
APP_Extracellular	F12_Extracellular	protein-protein
MIF_Extracellular	S100A7_Extracellular	protein-protein
FBLN2_Extracellular	LAMA5_Extracellular	protein-protein
FBLN2_Extracellular	LAMA1_Extracellular	protein-protein
FBLN2_Extracellular	HSPG2_Extracellular	protein-protein
FBLN2_Extracellular	FN1_Extracellular	protein-protein
TGFB1_Extracellular	THBS1_Extracellular	protein-protein
TGFB1_Extracellular	VTN_Extracellular	protein-protein
TGFB1_Extracellular	TGFB2_Extracellular	protein-protein
TGFB1_Extracellular	VASN_Extracellular	protein-protein
ECM1_Extracellular	HSPG2_Extracellular	protein-protein
F7_Extracellular	TFPI_Extracellular	protein-protein
EGFR_Extracellular	FGF2_Extracellular	protein-protein
EGFR_Extracellular	VEGFA_Extracellular	protein-protein
EGFR_Extracellular	PGF_Extracellular	protein-protein
EGFR_Extracellular	FGF5_Extracellular	protein-protein
EGFR_Extracellular	VEGFB_Extracellular	protein-protein
EGFR_Extracellular	S100A7_Extracellular	protein-protein
EGF_Extracellular	VTN_Extracellular	protein-protein
EGF_Extracellular	FGF5_Extracellular	protein-protein
EGF_Extracellular	EGFR_Extracellular	protein-protein
EGF_Extracellular	FLT1_Extracellular	protein-protein
PRSS1_Extracellular	SPINK5_Extracellular	protein-protein
MYOC_Extracellular	SERPINF1_Extracellular	protein-protein
F10_Extracellular	F7_Extracellular	protein-protein
F10_Extracellular	PLG_Extracellular	protein-protein
F10_Extracellular	F3_Extracellular	protein-protein
F10_Extracellular	F2_Extracellular	protein-protein
F10_Extracellular	THBD_Extracellular	protein-protein
F10_Extracellular	TFPI_Extracellular	protein-protein
FN1_Extracellular	SFRP2_Extracellular	protein-protein
FN1_Extracellular	KLK3_Extracellular	protein-protein
FN1_Extracellular	LPA_Extracellular	protein-protein
FN1_Extracellular	MYOC_Extracellular	protein-protein
FN1_Extracellular	THBS1_Extracellular	protein-protein
FN1_Extracellular	REG3A_Extracellular	protein-protein
FN1_Extracellular	LTBP1_Extracellular	protein-protein
IL18_Extracellular	IL18BP_Extracellular	protein-protein
LTBP1_Extracellular	THBS1_Extracellular	protein-protein
LTBP1_Extracellular	TGFB2_Extracellular	protein-protein
LTBP1_Extracellular	TGFB3_Extracellular	protein-protein
LTBP1_Extracellular	THBS4_Extracellular	protein-protein
LTBP1_Extracellular	TGFB1_Extracellular	protein-protein
PROC_Extracellular	SERPINE1_Extracellular	protein-protein
PROC_Extracellular	THBD_Extracellular	protein-protein
CCL4_Extracellular	IL8_Extracellular	protein-protein
PF4_Extracellular	THBD_Extracellular	protein-protein
PF4_Extracellular	PROC_Extracellular	protein-protein
NRP1_Extracellular	PGF_Extracellular	protein-protein
NRP1_Extracellular	SEMA3E_Extracellular	protein-protein
NRP1_Extracellular	VEGFA_Extracellular	protein-protein
NRP1_Extracellular	VEGFB_Extracellular	protein-protein
THBD_Extracellular	VTN_Extracellular	protein-protein
TFPI_Extracellular	THBS1_Extracellular	protein-protein
BMP2_Extracellular	TGFB2_Extracellular	protein-protein
BMP2_Extracellular	CHRDL1_Extracellular	protein-protein
BMP2_Extracellular	GREM2_Extracellular	protein-protein
BMP2_Extracellular	TGFB1_Extracellular	protein-protein
BMP2_Extracellular	ENG_Extracellular	protein-protein
BMP2_Extracellular	BMPER_Extracellular	protein-protein
IGFBP7_Extracellular	VEGFA_Extracellular	protein-protein
F12_Extracellular	PLG_Extracellular	protein-protein
APOH_Extracellular	PLG_Extracellular	protein-protein
APOH_Extracellular	LPA_Extracellular	protein-protein
APOH_Extracellular	F10_Extracellular	protein-protein
APOH_Extracellular	F12_Extracellular	protein-protein
APOH_Extracellular	LRP8_Extracellular	protein-protein
IL8_Extracellular	PF4_Extracellular	protein-protein
ADIPOQ_Extracellular	CDH13_Extracellular	protein-protein
ANXA2_Nuclear	ANXA2_Cytoplasmic	transport
TGFB3_Nuclear	TGFB3_Cytoplasmic	transport
CASK_Nuclear	CASK_Cytoplasmic	transport
IFI16_Nuclear	IFI16_Cytoplasmic	transport
NCL_Nuclear	NCL_Cytoplasmic	transport
EMG1_Nuclear	EMG1_Cytoplasmic	transport
ATPAF2_Nuclear	ATPAF2_Cytoplasmic	transport
FASLG_Nuclear	FASLG_Cytoplasmic	transport
GHRHR_Nuclear	GHRHR_Cytoplasmic	transport
EPAS1_Nuclear	EPAS1_Cytoplasmic	transport
HIF1A_Nuclear	HIF1A_Cytoplasmic	transport
PTHLH_Nuclear	PTHLH_Cytoplasmic	transport
HTATIP2_Nuclear	HTATIP2_Cytoplasmic	transport
FOXO4_Nuclear	FOXO4_Cytoplasmic	transport
SUMO1_Nuclear	SUMO1_Cytoplasmic	transport
FGF2_Nuclear	FGF2_Cytoplasmic	transport
SRF_Nuclear	SRF_Cytoplasmic	transport
AGGF1_Nuclear	AGGF1_Cytoplasmic	transport
HMOX1_Nuclear	HMOX1_Cytoplasmic	transport
MYH9_Nuclear	MYH9_Cytoplasmic	transport
EP300_Nuclear	EP300_Cytoplasmic	transport
ATP5B_Nuclear	ATP5B_Cytoplasmic	transport
NF1_Nuclear	NF1_Cytoplasmic	transport
UCHL1_Nuclear	UCHL1_Cytoplasmic	transport
TP63_Nuclear	TP63_Cytoplasmic	transport
APP_Nuclear	APP_Cytoplasmic	transport
CTNNB1_Nuclear	CTNNB1_Cytoplasmic	transport
TGFB1_Nuclear	TGFB1_Cytoplasmic	transport
EGFR_Nuclear	EGFR_Cytoplasmic	transport
NFKB1_Nuclear	NFKB1_Cytoplasmic	transport
HDAC9_Nuclear	HDAC9_Cytoplasmic	transport
STK39_Nuclear	STK39_Cytoplasmic	transport
MORG1_Nuclear	MORG1_Cytoplasmic	transport
PML_Nuclear	PML_Cytoplasmic	transport
ARD1B_Nuclear	ARD1B_Cytoplasmic	transport
BTG1_Nuclear	BTG1_Cytoplasmic	transport
TNFSF12_Nuclear	TNFSF12_Cytoplasmic	transport
S100A7_Nuclear	S100A7_Cytoplasmic	transport
CREBBP_Nuclear	CREBBP_Cytoplasmic	transport
JUN_Nuclear	JUN_Cytoplasmic	transport
TDGF1_Nuclear	TDGF1_Cytoplasmic	transport
CYFIP1_Nuclear	CYFIP1_Cytoplasmic	transport
PTPRM_Nuclear	PTPRM_Cytoplasmic	transport
SPINK5_Nuclear	SPINK5_Cytoplasmic	transport
HDAC5_Nuclear	HDAC5_Cytoplasmic	transport
CDH13_Nuclear	CDH13_Cytoplasmic	transport
HHEX_Nuclear	HHEX_Cytoplasmic	transport
ERBB2_Nuclear	ERBB2_Cytoplasmic	transport
SOX10_Nuclear	SOX10_Cytoplasmic	transport
BMP4_Cytoplasmic	BMP4_Extracellular	transport
ANXA2_Cytoplasmic	ANXA2_Extracellular	transport
ACE2_Cytoplasmic	ACE2_Extracellular	transport
CEACAM1_Cytoplasmic	CEACAM1_Extracellular	transport
FASLG_Cytoplasmic	FASLG_Extracellular	transport
ENG_Cytoplasmic	ENG_Extracellular	transport
SERPINE1_Cytoplasmic	SERPINE1_Extracellular	transport
F3_Cytoplasmic	F3_Extracellular	transport
LRP8_Cytoplasmic	LRP8_Extracellular	transport
TGFB2_Cytoplasmic	TGFB2_Extracellular	transport
PTHLH_Cytoplasmic	PTHLH_Extracellular	transport
CCL5_Cytoplasmic	CCL5_Extracellular	transport
FGF2_Cytoplasmic	FGF2_Extracellular	transport
SLIT2_Cytoplasmic	SLIT2_Extracellular	transport
RNH1_Cytoplasmic	RNH1_Extracellular	transport
HMOX1_Cytoplasmic	HMOX1_Extracellular	transport
FLT1_Cytoplasmic	FLT1_Extracellular	transport
VEGFA_Cytoplasmic	VEGFA_Extracellular	transport
TNFSF8_Cytoplasmic	TNFSF8_Extracellular	transport
TGFB1_Cytoplasmic	TGFB1_Extracellular	transport
F7_Cytoplasmic	F7_Extracellular	transport
EGF_Cytoplasmic	EGF_Extracellular	transport
ADAM23_Cytoplasmic	ADAM23_Extracellular	transport
GHRL_Cytoplasmic	GHRL_Extracellular	transport
MYOC_Cytoplasmic	MYOC_Extracellular	transport
F10_Cytoplasmic	F10_Extracellular	transport
THBS1_Cytoplasmic	THBS1_Extracellular	transport
REG3A_Cytoplasmic	REG3A_Extracellular	transport
CHID1_Cytoplasmic	CHID1_Extracellular	transport
NRP1_Cytoplasmic	NRP1_Extracellular	transport
CDH13_Cytoplasmic	CDH13_Extracellular	transport
SERPINF1_Cytoplasmic	SERPINF1_Extracellular	transport
PLXDC1_Cytoplasmic	PLXDC1_Extracellular	transport
TGFB3_Cytoplasmic	TGFB3_Extracellular	transport
ERAP1_Cytoplasmic	ERAP1_Extracellular	transport
IL6R_Cytoplasmic	IL6R_Extracellular	transport
JAG1_Cytoplasmic	JAG1_Extracellular	transport
RELL2_Cytoplasmic	RELL2_Extracellular	transport
F2_Cytoplasmic	F2_Extracellular	transport
COL1A1_Cytoplasmic	COL1A1_Extracellular	transport
PCSK5_Cytoplasmic	PCSK5_Extracellular	transport
ANTXR2_Cytoplasmic	ANTXR2_Extracellular	transport
WNT5A_Cytoplasmic	WNT5A_Extracellular	transport
AGGF1_Cytoplasmic	AGGF1_Extracellular	transport
IL6_Cytoplasmic	IL6_Extracellular	transport
CTGF_Cytoplasmic	CTGF_Extracellular	transport
OSM_Cytoplasmic	OSM_Extracellular	transport
USH2A_Cytoplasmic	USH2A_Extracellular	transport
GPC1_Cytoplasmic	GPC1_Extracellular	transport
TNFRSF25_Cytoplasmic	TNFRSF25_Extracellular	transport
APP_Cytoplasmic	APP_Extracellular	transport
MIF_Cytoplasmic	MIF_Extracellular	transport
EGFR_Cytoplasmic	EGFR_Extracellular	transport
VEGFB_Cytoplasmic	VEGFB_Extracellular	transport
CEACAM8_Cytoplasmic	CEACAM8_Extracellular	transport
THBS4_Cytoplasmic	THBS4_Extracellular	transport
TNFSF12_Cytoplasmic	TNFSF12_Extracellular	transport
FN1_Cytoplasmic	FN1_Extracellular	transport
S100A7_Cytoplasmic	S100A7_Extracellular	transport
TDGF1_Cytoplasmic	TDGF1_Extracellular	transport
PROC_Cytoplasmic	PROC_Extracellular	transport
PF4_Cytoplasmic	PF4_Extracellular	transport
SPINK5_Cytoplasmic	SPINK5_Extracellular	transport
THBD_Cytoplasmic	THBD_Extracellular	transport
TFPI_Cytoplasmic	TFPI_Extracellular	transport
BMP2_Cytoplasmic	BMP2_Extracellular	transport
ADIPOQ_Cytoplasmic	ADIPOQ_Extracellular	transport
