# Supplementary material for: Analysis of VEGF-A Regulated Gene Expression in Endothelial Cells to Identify Genes Linked to Angiogenesis
Source: PLoS One. 2011 Sep 13;6(9):e24887. doi: 10.1371/journal.pone.0024887 (PMC3172305; doi:10.1371/journal.pone.0024887)
Supplement: Table S3 — VEGF-induced gene expression correlation measurements. For each protein, we list the temporal correlation of the gene expression profile during VEGF-induced angiogenesis. A positive (negative) correlation value indicated a trend towards increasing (decreasing) gene expression after VEGF treatment. Results were shown for the three VEGF-A induced gene expression datasets. (XLS) [file pone.0024887.s003.xls]

## Sheet: Supplemental3_gene_expression_c
Table S3: VEGF-A induced gene expression correlation with time
Symbol	Annotated	HMVEC	HUVEC	TIME
IL1RL2	no	0.151975	-0.321374	NA
ANXA2	no	0.546226	0.124707	NA
IFI16	no	-0.323475	-0.805295	-0.03514
C17orf70	no	-0.780633	0.222693	-0.53169
GREM2	no	-0.0672743	NA	NA
ITGA5	yes	0.782428	0.0547974	NA
SFRP2	no	NA	-0.92582	NA
BMP6	no	-0.168631	-0.236157	-0.814339
PTPRK	no	0.800079	0.512682	-0.179116
PLG	no	-0.0388209	0.939478	-0.76831
NCOA5	no	NA	0.00661163	0.110425
TNFAIP6	no	0.622709	NA	NA
FASLG	yes	0.422069	0.801784	NA
ENG	no	-0.60068	-0.617213	-0.735324
CCL26	no	NA	0.236753	NA
SERPINE1	yes	-0.907128	0.25934	-0.178844
RNASE1	no	0.911285	0.308607	-0.607393
CYBA	no	-0.577417	-0.136697	-0.614186
TGFB2	yes	0.342982	0.87187	-0.473805
MYBPC3	no	0.389715	0.0783325	NA
KDR	yes	-0.457062	-0.561659	0.495232
CHRDL1	no	-0.668036	-0.658999	0.608597
COL4A2	yes	-0.917521	-0.667894	0.760402
CCL5	no	0.463899	0.13102	NA
SUMO1	no	0.830639	-0.85341	0.630976
NOX1	yes	0.952717	NA	NA
ROBO2	no	NA	0	-0.896848
PDGFRB	no	-0.168585	0.448279	NA
RNH1	yes	-0.72304	-0.0915809	0.404074
HMOX1	yes	-0.745727	0.955779	NA
EP300	no	0.519542	-0.44948	NA
NOXA1	no	NA	-0.810662	NA
ERAP2	no	-0.678236	-0.494441	NA
FLT1	no	0.938153	0.928081	0.381978
EDIL3	no	-0.36998	-0.524686	0.00866316
TGFBR2	no	0.732867	0.0547736	-0.00291857
PACSIN2	no	0.979968	0.835278	-0.837015
LRRC18	no	NA	-0.181639	NA
MYF5	no	-0.110248	0.93486	NA
PTPRS	no	-0.279183	-0.951987	NA
MEIS1	no	0.8455	0.734978	-0.119408
PML	yes	0.0674523	-0.267261	-0.8326
EGF	yes	-0.583038	NA	NA
SSX4	no	NA	NA	NA
OXSR1	no	0.602607	-0.171644	0.0725696
CEACAM6	no	-0.834292	0.617213	0.190563
MET	no	-0.0268467	0	NA
LEO1	no	NA	0.0270816	NA
CREBBP	no	0.7225	0.82193	NA
FSCN2	no	0.16253	0.401256	NA
RWDD4A	no	NA	-0.294599	NA
CHID1	no	NA	0.71687	NA
PTPRM	yes	0.394379	0.179439	0.952211
PLDN	no	NA	-0.582601	0.195434
NRP1	no	-0.687528	0.157057	NA
WARS	yes	0.0526032	0.781868	0.320288
CDH13	yes	-0.3253	-0.682803	0.964487
SUMO3	no	-0.799906	-0.717574	-0.190345
HHEX	yes	-0.107256	-0.676699	0.700503
SERPINF1	yes	-0.472046	0.308607	NA
ITGAV	no	0.428683	0.000133502	0.737835
Protein	Seed	NA	NA	NA
SOX10	no	0.408376	0.712097	NA
MYOG	no	-0.67927	0.963635	NA
IL8	yes	-0.0586474	-0.510718	NA
THY1	no	0.69508	0.803982	NA
TGFB3	no	0.244606	0.975234	0.0720582
BMP3	no	0.0812432	-0.92582	NA
GATA2	no	-0.504944	-0.0772215	-0.791027
ACVRL1	yes	-0.573348	-0.344277	0.157055
TGM2	no	0.712318	NA	NA
SERPINE2	no	-0.584706	-0.308607	NA
GALNT8	no	-0.659299	-0.741136	NA
MSSE	no	NA	NA	NA
ATP6AP1	no	-0.254452	0.718645	NA
HR	no	-0.816394	0.104446	NA
SIRPG	no	0.919377	0.0407323	NA
AGPAT5	no	-0.490874	-0.0459808	-0.164598
KRT1	yes	-0.709918	0.217241	NA
ANXA3	yes	0.00217282	-0.703704	NA
PGF	no	-0.873433	0.249747	NA
GHRHR	no	0.50512	0.534522	NA
SPHK1	yes	0.488997	0.439338	NA
LRP1B	no	-0.132041	NA	NA
ATPIF1	yes	0.525399	0.642381	-0.511077
ROBO1	yes	0.351037	-0.775446	NA
POFUT1	no	0.946009	-0.0282916	0.0336762
MLNR	no	0.145184	0.534522	NA
TEK	no	-0.562758	0.348608	-0.692194
FOXO4	yes	0.584195	0.932705	NA
F2	no	0.929674	0.400335	0.096582
COL1A1	no	-0.125464	0.488025	-0.514345
TPH1	no	0.320532	0.308607	NA
PCSK5	no	0.352123	-0.501946	NA
NKX2-3	no	NA	0	NA
WNT5A	yes	0.454111	0.308607	NA
OSM	no	0.58606	0.629921	NA
USH2A	no	0.346974	0.92582	NA
NF1	yes	0.704388	-0.641684	-0.144685
UCHL1	no	-0.307976	0.222708	NA
SCG2	yes	0.80619	-0.67616	NA
AAMP	yes	0.200782	-0.649455	-0.618905
PPFIBP1	no	-0.612409	-0.890984	-0.785471
CDH16	no	0.941821	0	NA
NPR3	no	-0.480862	0.961017	NA
CPM	no	-0.411137	0.113494	-0.64521
LPA	no	-0.416863	0.534522	NA
CTNNB1	yes	0.173943	0.782166	0.689701
HOXA5	yes	0.983209	0.459127	NA
MIF	no	NA	NA	NA
P2RY2	no	0.249684	0.50382	0.139843
EGFR	no	0.3156	-0.63625	-0.213706
NFKB1	no	0.11591	0.447086	0.302337
TNFRSF6B	no	NA	NA	NA
ARD1B	no	NA	NA	NA
BTG1	yes	-0.439853	0.116806	-0.229
SPHKAP	no	NA	-0.671678	NA
NPPB	yes	0.502031	0.399969	NA
CEACAM8	no	-0.5939	-0.617213	NA
ITGB3	yes	0.875134	0.901424	-0.397884
THBS4	yes	-0.549629	-0.928403	NA
HIF3A	no	0.528593	0.617213	NA
S100A7	yes	0.822794	0.308607	NA
VTN	no	0.434067	-0.333157	NA
IL18	yes	-0.787575	0.727905	NA
C1GALT1	yes	-0.386225	-0.72982	0.356839
ROR2	no	0.201776	0.445449	0.119993
ANGPTL3	yes	0.343396	-0.308607	NA
CYFIP1	no	0.588035	0.12696	0.379998
CCL4	no	0.365186	-0.561951	NA
PF4	yes	0.198967	0.125397	NA
ANGPT4	yes	0.739595	0.245399	NA
HOXC9	no	NA	0.308607	NA
HDAC5	yes	0.158269	0.825702	0.139959
BMP2	no	0.116968	0.00829654	0.0548732
F12	no	-0.880246	0.93486	-0.142168
ERBB2	yes	-0.489692	0.92582	-0.59765
APOH	yes	-0.578572	0.534522	NA
SDC1	no	0.518365	-0.778175	NA
ORM1	no	0.875779	0.92582	NA
IGFBP1	no	0.58579	0.92582	NA
STAB1	yes	-0.7345	-0.0601022	NA
BMP4	yes	-0.119392	-0.527083	-0.675626
CDX4	no	0.00780106	-0.321038	NA
ACE2	no	-0.965989	0.267261	NA
GRIN1	no	-0.440297	0.534522	NA
CALB2	no	-0.169289	-0.0907054	NA
FOS	no	-0.732881	-0.486528	-0.364614
FABP5	no	NA	NA	0.62022
IL17F	yes	NA	-0.785537	NA
SEMA3E	no	-0.570714	0	NA
SLC12A1	no	-0.253878	-0.308607	NA
CEACAM1	yes	0.885696	-0.238237	NA
BTBD10	no	NA	-0.0169117	NA
DCN	no	0.586882	0.977679	NA
VHLL	no	NA	NA	NA
F3	yes	0.336738	0.574239	NA
LRP8	no	-0.835792	0.911074	NA
TGFBRAP1	no	-0.419655	-0.6104	0.268749
NISCH	no	0.331348	0.2338	0.400988
EPAS1	no	-0.808191	-0.92582	-0.527511
PTHLH	no	0.272167	0.941018	-0.854774
HTATIP2	yes	0.719318	0.707666	0.85968
TPH2	no	NA	0.534522	NA
CD36	no	0.863933	-0.801784	NA
DEFA5	no	-0.286648	-0.92582	NA
FGF2	yes	-0.481693	-0.695773	NA
SLIT2	yes	-0.338754	0.67306	NA
ID1	yes	-0.745505	-0.177458	-0.0859001
COL18A1	no	0.797198	0.07808	0.918418
MYH9	yes	-0.59974	-0.165098	-0.927627
ANG	yes	-0.499604	0.128531	NA
TNXB	no	-0.81763	NA	NA
OTOF	no	0.548756	0.252605	NA
ATP5B	yes	0.531122	0.38896	NA
CXorf45	no	NA	NA	NA
SLC12A6	yes	0.275527	-0.154679	-0.274037
BCAM	no	0.910163	0.0224497	0.567912
POR	no	-0.854922	0.122743	-0.0728448
VEGFA	yes	0.180442	0.0931415	NA
MYF6	no	0.0197518	0.267261	NA
LAMA1	no	0.286686	-0.308607	NA
NPR1	yes	-0.315154	-0.669297	NA
TNFSF8	no	0.445096	0.534522	NA
TGFB1	no	-0.296272	0.0447711	0.454759
FBLN2	no	0.254582	-0.152582	0.603687
F7	no	0.835924	0.0282284	NA
MORG1	no	NA	NA	NA
CDK2AP2	no	-0.801643	0.271641	NA
ADAM23	no	0.000123234	-0.133198	NA
ROBO4	yes	-0.956987	-0.487463	0.189604
IL18R1	no	-0.403929	-0.653264	NA
GHRL	yes	NA	0.443049	NA
F10	no	-0.935144	0.0308818	NA
MYOC	no	-0.226396	0.121302	NA
EFEMP2	no	-0.465128	-0.628673	-0.185395
AMOT	yes	0.139517	-0.308607	NA
CXCL9	no	0.160348	-0.534522	0.393316
THBS1	yes	-0.388574	-0.731903	-0.953242
STAB2	yes	0.479909	0.267261	NA
JUN	no	0.38853	0.110771	0.601806
HOXB3	yes	0.141802	-0.167547	NA
DYNC1LI2	no	-0.0748668	-0.227024	0.703383
REG3A	no	0.476963	NA	NA
SCARB2	no	0.762972	0.648377	0.328554
LTBP1	no	0.964065	-0.978378	-0.365338
SDC2	no	-0.716937	-0.178451	-0.618505
IGFBP7	no	-0.957709	0.840306	0.80101
PLXDC1	yes	-0.637878	-0.267261	NA
HOXA7	yes	0.17733	0.889387	NA
OVGP1	no	0.591069	-0.448877	NA
MAGI1	no	0.506011	-0.373615	NA
CASK	no	0.548589	-0.130059	0.66556
ERAP1	yes	0.188675	0.801784	NA
PZP	no	0.304634	0.304904	NA
HSPG2	no	-0.652015	-0.0947925	0.955974
TWIST1	no	0.145067	-0.308607	NA
EMG1	no	-0.701817	0.236036	NA
NCL	yes	0.532468	-0.21971	-0.69401
LAMA5	yes	0.656206	-0.758994	-0.300658
HOXB13	yes	-0.433495	0	NA
IL6R	no	-0.579926	0.0823148	-0.725077
TNFRSF12A	no	-0.94226	0.630659	-0.0126573
ATPAF2	no	-0.643581	0.89757	-0.306612
EGR3	no	-0.364314	-0.149072	NA
JAG1	yes	0.810306	-0.383534	-0.927927
KLK3	yes	-0.28698	-0.308607	NA
BMPER	yes	NA	-0.927468	NA
AMHR2	no	0.582713	-0.106452	NA
RELL2	no	NA	0.92582	NA
HIF1A	yes	0.590488	0.847355	0.894372
TP73	no	0.332227	0.534522	NA
EPHB4	yes	-0.459409	-0.617935	-0.734802
TMPRSS6	yes	0.297821	0.534522	NA
SRF	yes	-0.972512	-0.240557	NA
GHSR	no	0.0369068	-0.770195	NA
SOX18	yes	-0.367148	0.11593	-0.550081
ANTXR2	no	NA	-0.801784	0.805447
COL4A3	yes	0.560309	-0.267261	NA
AGGF1	yes	0.949742	-0.59092	NA
ADCY6	no	0.156726	0.869496	0.0999333
IL6	yes	-0.824748	-0.890005	NA
ENAH	no	0.293211	-0.267261	-0.666582
CCR3	yes	0.633289	-0.167215	NA
CTGF	no	-0.818568	-0.235024	-0.887929
TCF4	no	-0.668954	0.827146	0.767795
ROBO3	no	0.651322	-0.0991254	0.00995224
FGF5	no	-0.644286	0.0269607	NA
FANCB	no	NA	-0.138546	NA
IL18RAP	no	0.401138	-0.0864317	NA
GPC1	no	0.0264355	0.106564	-0.130872
CCL24	no	0.257993	-0.659825	NA
TNFRSF25	no	0.731426	-0.287142	0.308069
SLIT1	no	0.465078	-0.175212	0.0807572
TP63	no	-0.703095	0	NA
BLVRB	no	-0.812058	0.0340997	0.182207
ANGPT1	yes	0.229355	0.42246	NA
APP	no	0.852092	0.814972	0.849615
PTPRA	no	-0.351385	-0.179405	-0.260337
MNX1	no	-0.91277	0.784854	NA
ECM1	yes	-0.475475	0.309774	0.136655
EN2	no	0.736501	0.820792	NA
EFNB3	no	0.329	0.878776	NA
HDAC9	yes	-0.502491	-0.108822	NA
STK39	no	0.923434	-0.200937	-0.958132
HOXA3	yes	0.0283605	0.0101391	NA
BMP8B	no	-0.486007	0.634344	NA
VEGFB	yes	-0.87036	0.623686	0.898827
SAA1	no	NA	NA	0.115695
PRSS1	no	-0.193292	-0.713353	NA
IL18BP	no	-0.340299	0.617213	0.781153
VASN	no	NA	0.92582	NA
CDH24	no	NA	0.449954	NA
TNFSF12	yes	0.311932	-0.0633048	NA
CEACAM3	no	-0.497553	0.803429	NA
FN1	no	0.390234	-0.0675379	0.301434
CHRNA7	yes	NA	NA	NA
TDGF1	no	NA	NA	NA
FOXG1	no	0.0380749	0.828455	NA
ANGPT2	no	-0.0798165	0.539437	-0.416984
SDC3	no	-0.597085	0.353221	0.444952
PROC	no	0.0906081	0.981445	NA
MEF2C	no	0.986574	0.822493	0.631807
HOPX	no	-0.66256	-0.356489	NA
GHRH	no	0.155825	0.534522	NA
SPINK5	yes	0.475589	-0.92582	NA
THBD	no	-0.752933	0.945671	-0.894482
FGFRL1	no	NA	-0.321038	NA
TFPI	no	-0.731376	-0.622235	NA
DNAJC7	no	-0.660644	0.494395	NA
MYOD1	no	-0.500816	0.407913	NA
AQP1	yes	0.401466	-0.834245	NA
CDH17	no	0.112462	0	NA
ADIPOQ	no	0.391447	0.617213	NA
